# Supplementary material
Source: PubMed Central journal article supplement (PMC7003461)
Supplement: rspb20192440supp1.pdf [file rspb20192440supp1.pdf]

## Supplementary Information

Bivalve mollusk circadian clock genes can run at tidal frequency.

Damien Tran, Mickael Perrigault, Pierre Ciret, Laura Payton

Journal : Proceedings of the Royal Society B: Biological Sciences

DOI: 10.1098/rspb.2016.0049

Corresponding author: Damien Tran

E-mail: [damien.tran@u-bordeaux.fr](mailto:damien.tran@u-bordeaux.fr)

### **The following items are provided:**

Method S1: Supplementary Methods

Figure S1: Temperature and light intensity during the field experiment

Figure S2: Individuals valve behavior in the field

Figure S3: Individual valve behavior under constant darkness in laboratory

Table S1: Experimental supplementary information's of behavioral and molecular analyses in the field

Table S2: Field chronobiological analysis of individual oyster behavior

Table S3: Forward, reverse primer sequences of Real-Time PCR analyzed genes

## **Methods S1: Supplementary method information**

### **Experimental model and subject details**

All animal studies were conducted in accordance with local legislation. All investigations were performed on Pacific oysters, *C. gigas*, of comparable age (1.5 years old, 65-75 mm shell length). All oysters were from natural recruitment in Arcachon Bay, in southwest France, and cultivated in the same area by the oyster farm “Port du Rocher” (La Teste de Buch, Arcachon Bay, France). Before each experiment, oysters were translocated and kept either at the study site (Eyrac pier, Arcachon Bay, France, latitude 44.66°, longitude -1.16°) or at the Marine station of Arcachon (Arcachon Bay, France) with a continuous flow of natural sea water from the bay and a natural photoperiod.

### **Site characteristics of the field study**

Field experiments were performed at Eyrac pier, located in Arcachon Bay, on the western coast of France (latitude 44.66°, longitude -1.16°). The site is connected to the open Atlantic Ocean and exposed to semidiurnal tide regimes, i.e., 2 tides per day, with a maximum amplitude of  $\pm 2.4$  m and a tidal flow at midtide reaching  $0.6 \text{ m}\cdot\text{s}^{-1}$  during spring tides [1]. Oysters were placed at a depth of 4 m ( $\pm$  tides), i.e. always in subtidal conditions, with at least 1.6 m of seawater above them. Animals were in close proximity to wild oysters. Temperature ( $^{\circ}\text{C}$ ) and light intensity in Lux (n.b. the conversion to light irradiance in  $\mu\text{mol m}^{-2} \text{s}^{-1}$  was not possible) were measured all along the field study every 10 minutes by a data logger (HOBO Pendant® Temperature/Light Data Logger, Onset Computer Corporation, Bourne, MA, USA) fixed to the bag with oysters

equipped for valve activity study and were provided figure S1. Variations in water height at Eyrac pier were provided by the French Marine Service of Oceanography and Hydrography (SHOM, [www.shom.fr](http://www.shom.fr)). The astronomical data related to sun, earth, and moon positions were retrieved from the website [www.timeanddate.com](http://www.timeanddate.com) and are available table S1.

### **Valve activity behavior in the field study**

For the valve activity behavior in the field experiment, 15 oysters were placed in a bag fixed on a permanently immersed oyster table on March 5, 2018. The valve activity behavior of these oysters was recorded for 18 days (March 5 to 23, 2018, 00 corresponds to 17 h, local time, UTC +1) using a high-frequency noninvasive (HFNI) valvometer field technology [2]. Briefly, a pair of lightweight electrodes designed to minimize disturbance to bivalve behavior were glued on each half shell. These electrodes were connected to the valvometer by flexible wires, which allowed the oysters to move their valves without constraints. Between the electrodes, an electromagnetic current was generated, which allowed measurements of the amount of valve opening and closing. The signal was recorded using a custom acquisition card every 0.1 sec, and the data were automatically transmitted daily to a data processing center at the Arcachon Marine Biological Station (France) using cellular and Internet networks.

### **Sampling for gene expression in the field study**

For the gene-expression field experiment, 112 oysters were placed in the study site on March 5, 2018, in 16 oysters bags (7 oysters per bag). Gill tissues were sampled from 7 oysters every 3.1 h from 14 March 2018 at 18 h 48 to 16 March 2018 at 17 h 18 (local time, UTC +1), i.e., 16 sampling

times for 46.5 h. The experimental sampling details are in Table S1. The oysters were quickly dissected (2-3 min) in a shelter on the Eyrac pier under dim red light during the night. Gill tissues were immediately and individually transferred into 700  $\mu$ L of RNA lysis buffer (Kit SV Total RNA Isolation System, Promega) with 0.5 g of ceramic beads and homogenized before storage at  $-80^{\circ}\text{C}$ .

### **Experiments in controlled environments**

Experiments (VOA free-run experiment, DD and LD gene expression experiments [3,4]) were performed at the Marine Station of Arcachon (France) in an isolated room. Oysters were placed in tanks isolated from external vibration using an antivibrating bench and continuously supplied with homogenized seawater of constant composition (oxygen, pH and salinity) and at a constant temperature. To prevent from any putative tidal chemosensory cues in the seawater supply, this natural seawater was, first, stored and mixed, in one time, in a 50  $\text{m}^3$  tank. Then, this water was stored in transient tank in the experimental room. In this 150-L tank, the seawater is homogenized with pumps and air-bubbling to break any putative cycles of environmental cues, related to tides for example. The light-dark (LD) regime was rectangular. Photosynthetically active radiation (PAR) during the photophase was produced by neon lights (MASTER TL-DXtra 36 W/865 1SL, Philips) with an irradiance of  $19 \mu\text{mol m}^{-2} \text{s}^{-1}$  at the air-water interface (Biospherical Instruments Inc., San Diego, CA, USA), corresponding to a typical overcast day at midday. Fixed average temperature and LD-cycles were defined according to field conditions at the time of the experiments. The sampling of oysters was performed under dim red light during dark phases.

### **Valve activity behavior record in the laboratory experiment**

For the free-running (FR) behavior laboratory experiment, 14 oysters were pre-equipped with lightweight electrodes and placed in the study site (subtidal conditions, Eyrac pier, Arcachon Bay, France) on February 20, 2014 for 3.5 weeks. On March 17, 2014, oysters were placed in the laboratory, divided into 2 tanks under constant darkness (dark-dark, DD), without a food supply. The temperature was fixed at  $13 \pm 0.5^{\circ}\text{C}$ . The electrodes were welded for the study of valve behavior with HFNI valvometer laboratory technology over 7 days, from March 18 to March 24, 2014.

### **Sampling for gene expression in laboratory experiments**

The experimental protocols for the FR experiment (DD) and the experiment under LD entrainment are described in [3] and [4], respectively, from where raw data were extracted and used for the RAIN analysis. Briefly, in DD, oysters were exposed to LD entrainment (L:D 10:14 cycle) and fixed temperature at  $17.6 \pm 0.1^{\circ}\text{C}$  for 15 days, followed by constant darkness for 15 other days. A total of 8 gill tissue samplings were performed in DD at CT 1, CT5, CT 9, CT 11, CT 15 and CT 23 on day 14 and finally at CT 1 on day 15. In LD experiment, oysters were exposed to LD entrainment (L:D 9:15 cycle, close to the natural photoperiod at that time) and fixed temperature at  $15 \pm 0.2^{\circ}\text{C}$  for 13 days. A total of 7 gill tissue samplings were performed every 4 h: ZT 0.5, ZT 4.5, ZT 8.5, ZT 12.5, ZT 16.5 and ZT 20.5 on day 12 and ZT 0.5 on day 13.

### **Quantification and statistical analysis**

#### **Valve behavior quantification**

Field and laboratory valve behavior data were manually analyzed with LabView 8.0 software (National Instruments). Individual valve opening amplitudes (VOA) of each oyster were reported each day as a percentage, with 100 % indicating that the valves were opened at their maximum amplitude and 0 % indicating that the valves were closed. Then, the VOA % was reported individually on an hourly basis.

### **Valve behavior statistical analysis**

Chronobiological analyses were performed using TSA Serial Cosinor 6.3 software (Expert Soft Tech). Several steps were required to validate a significant rhythm [1,5]. Four steps must be validated. First, the quality of the data set was assessed by controlling for the absence of randomness using the autocorrelation diagram [6]. Second, the absence of a stationary phenomenon was checked by using a partial autocorrelation function (PACF) calculation [6]. Third, the recorded data were tested for periodicities by the spectral method of the Lomb and Scargle periodogram, which combines the principle of a regression analysis and Fourier transformations [7]. This method gives a threshold of probability ( $p = 0.95$ ) defining the limit below which the signal can be regarded as “noise”. Fourth, the rhythmicity was validated and modeled with the cosinor model, which uses a cosine function calculated by regression [8,9]. For a given period, the model is written as  $Y(t) = A \cos(\pi t/\tau + \phi) + M + \varepsilon(t)$  where  $Y(t)$  is an observation of the mean VOA at time  $t$ ,  $A$  is the amplitude,  $\phi$  is the acrophase,  $\tau$  is the period,  $M$  is the mesor and  $\varepsilon$  is the relative error. Two key tests validated the calculated model and the existence of a rhythm: the elliptic test had to be rejected, and the probability for the null amplitude hypothesis had to be  $< 0.05$ . Then, to account for multiple testing of behavioral expressions, Benjamini-Hochberg adjusted  $p$ -values  $< 0.05$  were considered significant [10]. A chronobiometric parameter was calculated; the percent rhythm (PR,

%) is the percentage of cyclic behavior explained by the model. For a set of data, several significant periodicities could occur. To identify significant secondary periodicities, we reinjected the previously calculated residues of the Cosinor model to remove the trend related to the first statistical period and then repeated the entire procedure (1-4 steps). This entire procedure was necessary to validate secondary periodicities.

### **Gene expression quantification**

For the field study, total RNA from the gills was extracted from samples using SV Total RNA Isolation System kits (Promega). Total RNA quantity and quality were assessed by spectrophotometry and reverse transcribed using GoScript™ Reverse Transcription System kits (Promega). Real-time qPCR reactions were performed on individual samples using the GoTaq<sup>R</sup> qPCR Master Mix kit (Promega). For experiments in controlled environments (DD and LD), methods for total RNA extraction from the gills and gene expression quantification are explained in [3] and [4], respectively.

Primer sets of circadian clock genes, clock-associated genes and housekeeping genes applied in this study are listed Table S3. Elongation factor 1 was selected as the housekeeping gene using geNorm, BestKeeper and Normfinder [11]. The comparative Ct method  $2^{-\Delta\Delta Ct}$  method [12] was used to determine the relative transcript levels of candidate genes, where  $\Delta Ct = Ct(\text{gene}) - Ct(\text{housekeeping gene})$ . The data were then normalized by the lowest expression value of each gene.

### **Gene expression statistical analysis**

Datasets of gene expressions were investigated for tidal and circadian periodicities in R [13] (32-bit, version 3.2.2) using the RAIN package [10]. The RAIN algorithm is a robust nonparametric method for the detection of rhythms of specified periods in biological data that can detect arbitrary wave forms. Each time series (field study, LD laboratory experiment, and DD laboratory experiment) was analyzed separately as one dataset. The field study and LD laboratory experiment time series were analyzed as regular time series, while the DD laboratory experiment was analyzed as an irregular time series. All the datasets were treated with an independent method as time points were sampled independently from different biological specimens. Different peak shapes were tested for each dataset, and the most significant model was selected for each gene. Circatidal/tidal periodicities were defined by a significant period range of  $12.4 \pm 3.1$  h, and circadian/daily periodicities were defined by a significant period range of  $24 \pm 4$  h. To account for multiple testing of genes (a total of 56 tests of gene expression), Benjamini-Hochberg adjusted  $p$ -values  $< 0.05$  were considered significant [10].

## **CODE AVAILABILITY**

For the RAIN rhythm analysis script, the algorithm could be found using the RAIN package [10].

## **References**

1. Tran D, Nadau A, Durrieu G, Ciret P, Parisot J-P, Massabuau J-C. 2011 Field chronobiology of a molluscan bivalve: How the Moon and Sun cycles interact to drive oyster activity rhythms. *Chronobiology International* **28**, 307–317. (doi:10.3109/07420528.2011.565897)



2. Andrade H, Massabuau J-C, Cochrane S, Ciret P, Tran D, Sow M, Camus L. 2016 High frequency non-invasive (HFNI) bio-sensors as a potential tool for marine monitoring and assessments. *Front. Mar. Sci.* **3**. (doi:10.3389/fmars.2016.00187)
3. Perrigault M, Tran D. 2017 Identification of the molecular clockwork of the oyster *Crassostrea gigas*. *PLOS ONE* **12**, e0169790. (doi:10.1371/journal.pone.0169790)
4. Payton L *et al.* 2017 Remodeling of the cycling transcriptome of the oyster *Crassostrea gigas* by the harmful algae *Alexandrium minutum*. *Scientific Reports* **7**, 3480. (doi:10.1038/s41598-017-03797-4)
5. Gouthiere L, Mauvieux B, Davenne D, Waterhouse J. 2005 Complementary methodology in the analysis of rhythmic data, using examples from a complex situation, the rhythmicity of temperature in night shift workers. *Biological Rhythm Research* **36**, 177–193. (doi:10.1080/09291010400026298)
6. Box GEP, Jenkins GM, Reinsel GC, Ljung GM. 2015 *Time series analysis: Forecasting and control*. John Wiley & Sons.
7. Scargle JD. 1982 Studies in astronomical time series analysis. II-Statistical aspects of spectral analysis of unevenly spaced data. *The Astrophysical Journal* **263**, 835–853.
8. Bingham C, Arbogast B, Guillaume GC, Lee JK, Halberg F. 1982 Inferential statistical methods for estimating and comparing cosinor parameters. *Chronobiologia* **9**, 397–439.
9. Nelson W, Tong YL, Lee JK, Halberg F. 1979 Methods for cosinor-rhythmometry. *Chronobiologia* **6(4):305**.
10. Thaben PF, Westermark PO. 2014 Detecting rhythms in time series with RAIN. *J Biol Rhythms* **29**, 391–400. (doi:10.1177/0748730414553029)
11. Wang Q, Ishikawa T, Michiue T, Zhu B-L, Guan D-W, Maeda H. 2012 Stability of endogenous reference genes in postmortem human brains for normalization of quantitative real-time PCR data: comprehensive evaluation using geNorm, NormFinder, and BestKeeper. *Int J Legal Med* **126**, 943–952. (doi:10.1007/s00414-012-0774-7)
12. Livak KJ, Schmittgen TD. 2001 Analysis of relative gene expression data using real-time quantitative PCR and the  $2^{-\Delta\Delta CT}$  method. *Methods* **25**, 402–408. (doi:10.1006/meth.2001.1262)
13. R Core Team. 2013 R: The R project for statistical computing. See <https://www.r-project.org/> (accessed on 5 March 2019).

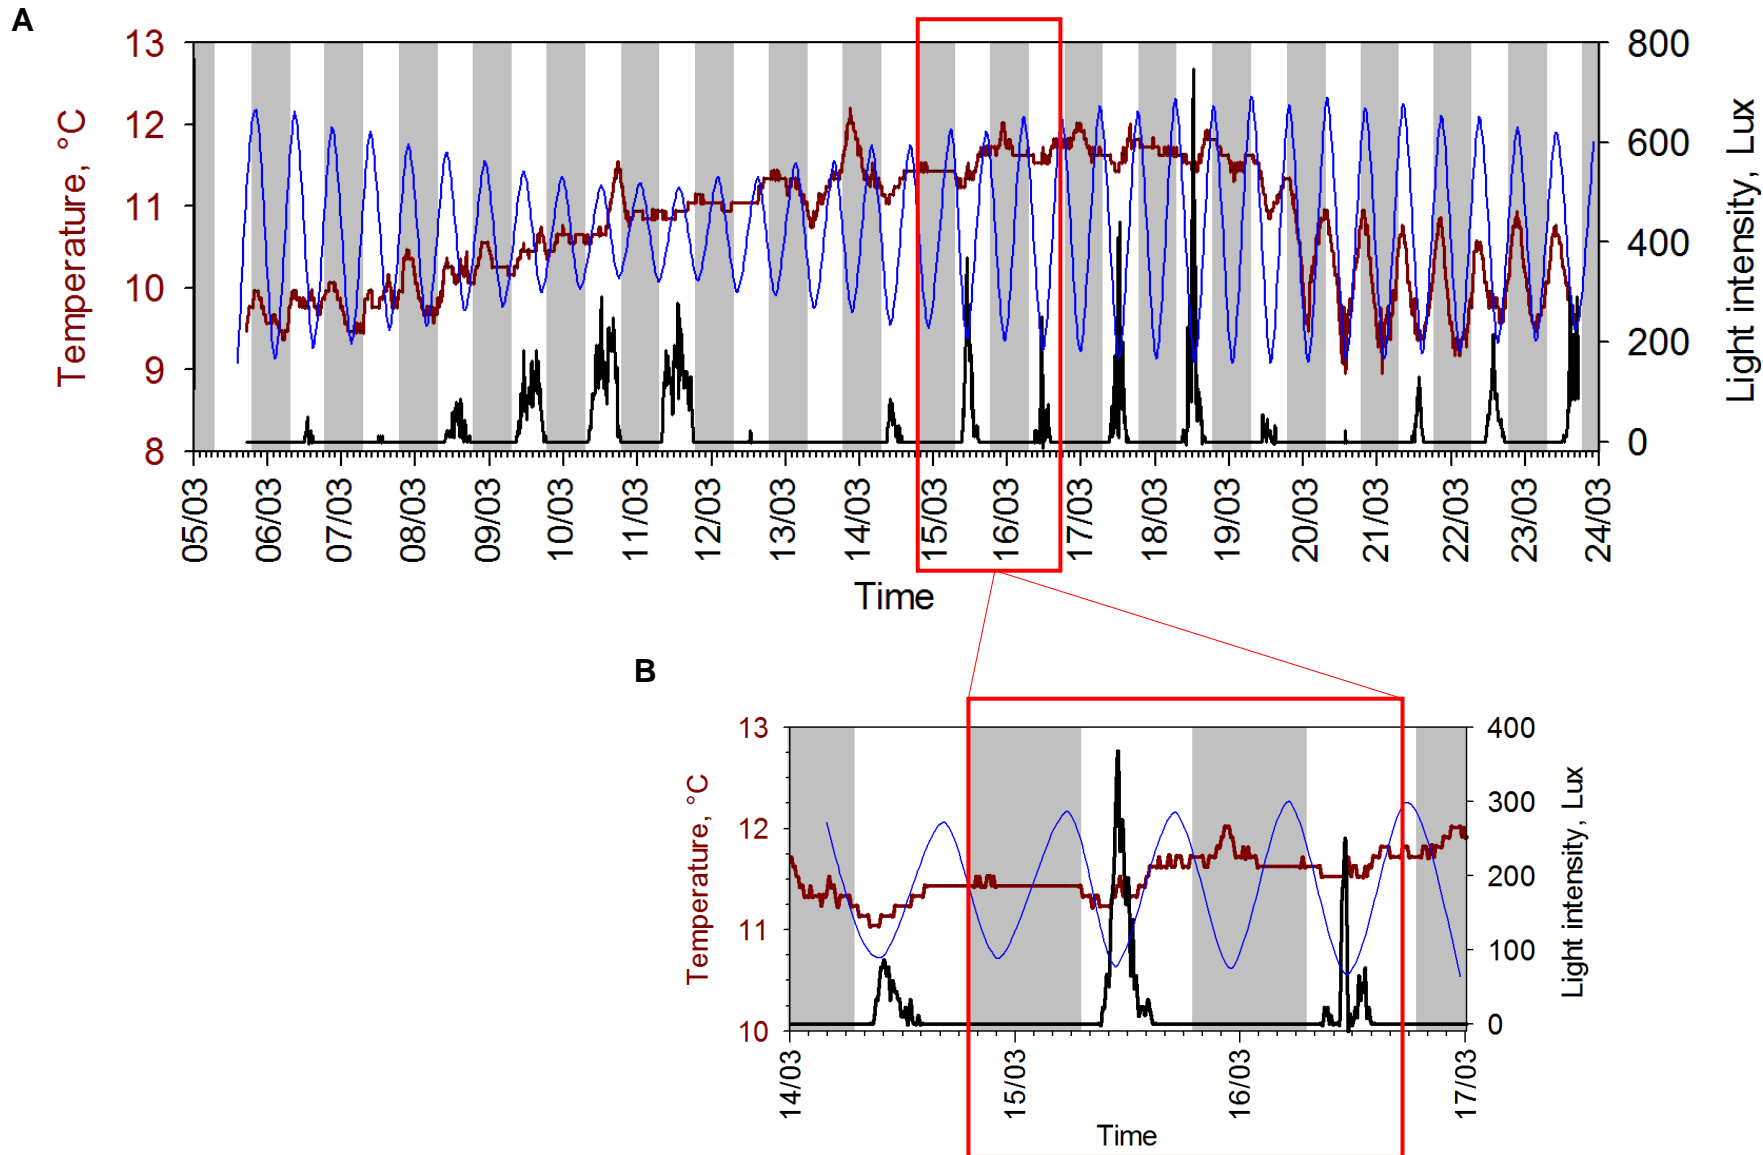

**Figure S1. Temperature and light intensity during the field experiment at 4 m depths ( $\pm$  tides) (Eyrac, Arcachon Bay, France, 44,66°N).** Related to Figure 2 and Figure 3. Temperature ( $^{\circ}\text{C}$ , dark red line) and light intensity (Lux, dark line) were measured every 10 minutes by a data logger (HOBO Pendant<sup>®</sup> Temperature/Light Data Logger) fixed to the bag with oysters. Gray areas indicate night phases and blue line indicate the tide wave. (A) Data over the 18 days of behavioral analysis (March 5, 2018, 17 h to March 23, 2018, 17h (local time, UTC +1)). (B) Focus on the days of sampling for molecular analysis. The red box indicates the exact time of molecular sampling (from March 14, 2018, at 18 h 48 to March 16, 2018, at 17 h 18 (local time, UTC +1)). Each date is indicated at midnight (local time UTC +1).

# A1 Field behavior

# A2 Periodograms

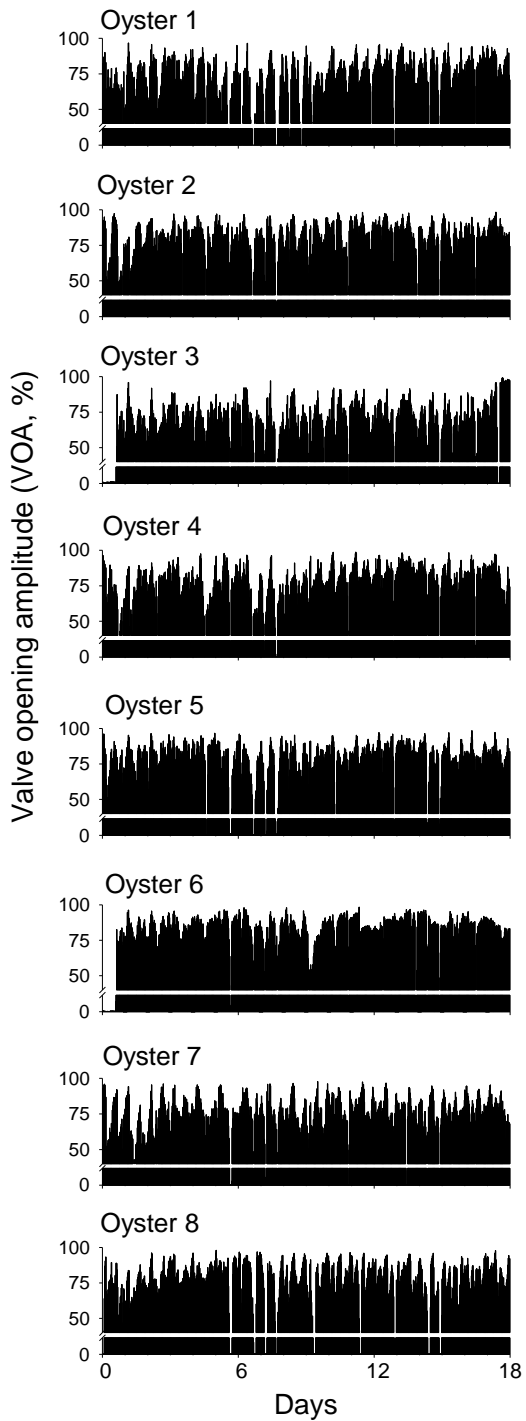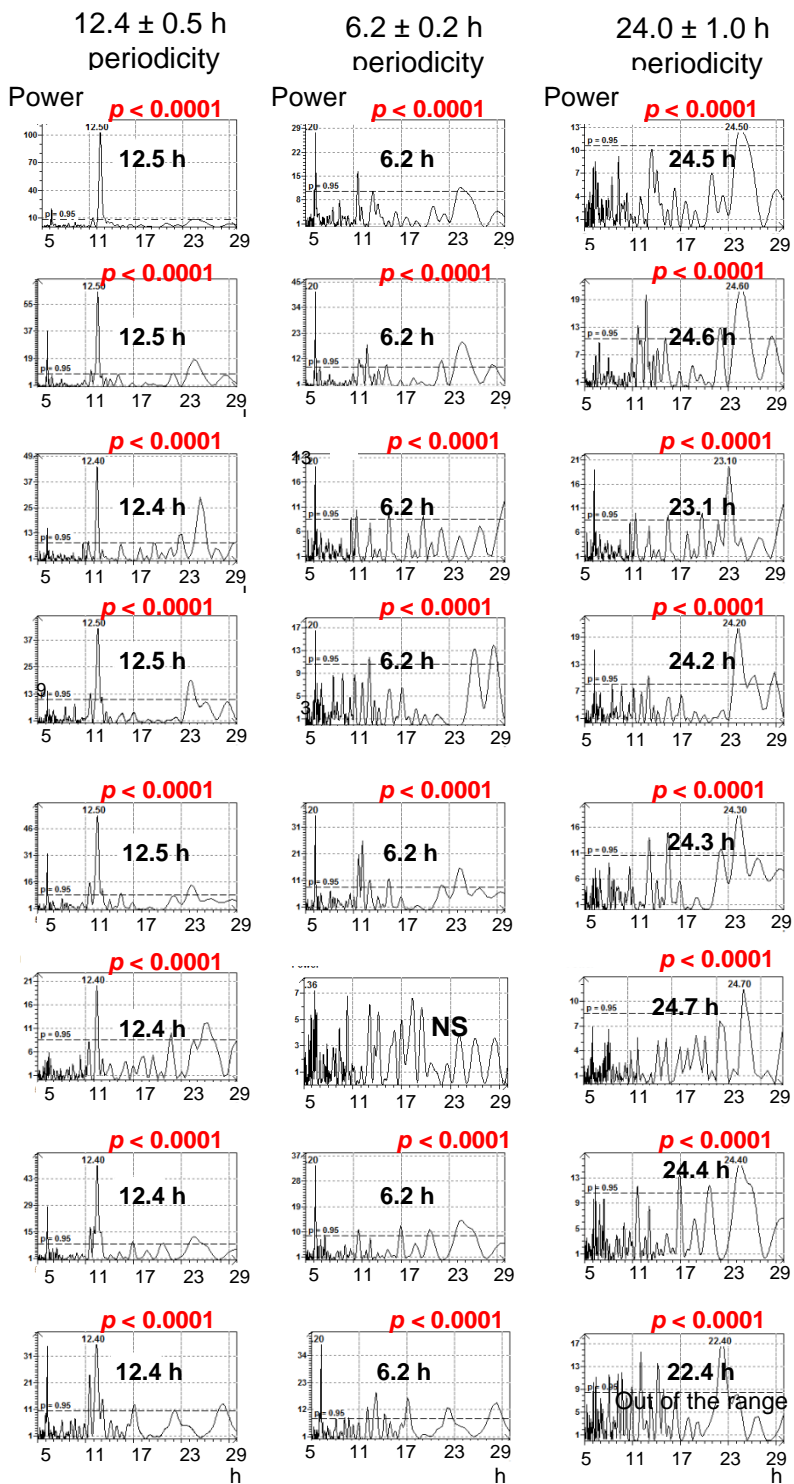

## A1 Field behavior

## A2 Periodograms

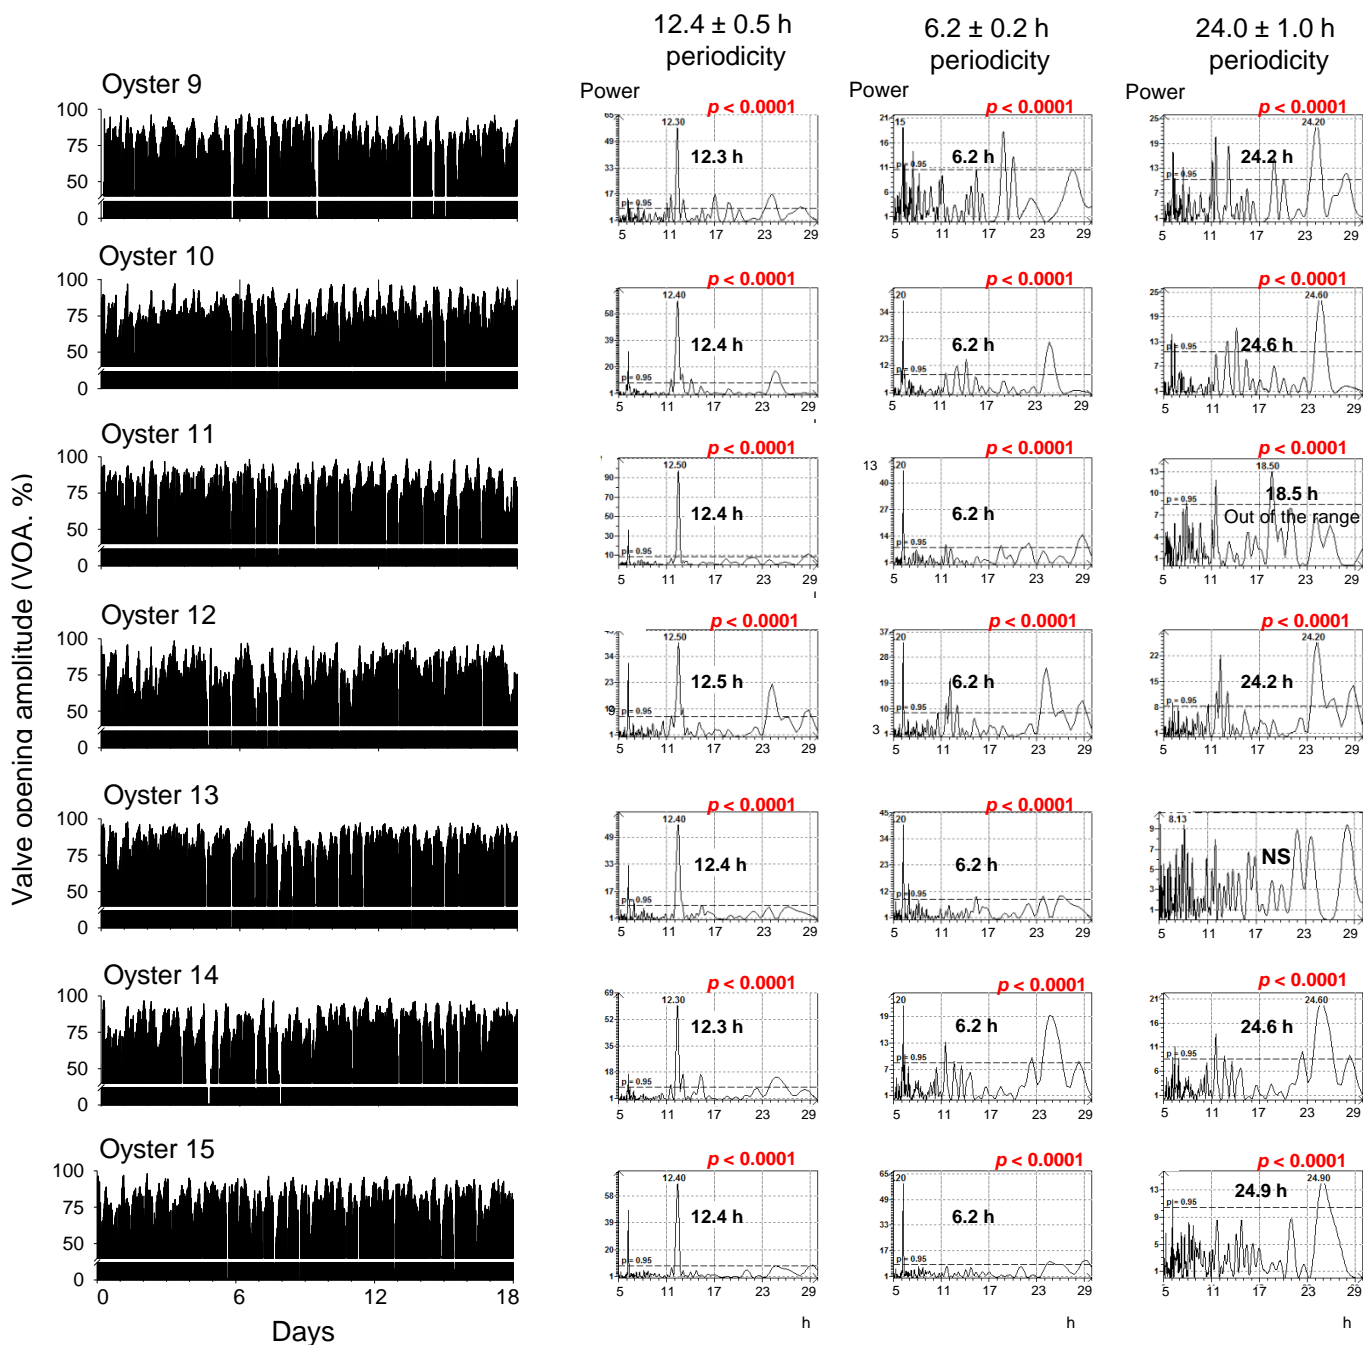

**Figure S2. Individuals valve behavior in the field.** Related to Figure 2B. (A1) Individuals hourly valve opening amplitudes (VOA, %) during the 18 days of field experiment (05/03/2018 – 23/03/2018, Eyrac, Arcachon Bay, France at 44.66°N). (A2) Individuals chronobiological analyses: search of tidal ( $12.4 \pm 0.5$  h and  $6.2 \pm 0.2$  h) and daily ( $24 \pm 1$  h) periods determined by spectral analysis (Lomb and Scargle periodogram; dotted line for  $p$ -value  $> 0.95$ ) and adjusted  $p$ -value (in red) of the associated Cosinor model. 2<sup>nd</sup> significant periodicities were found after residues injection. NS means “non significant”.



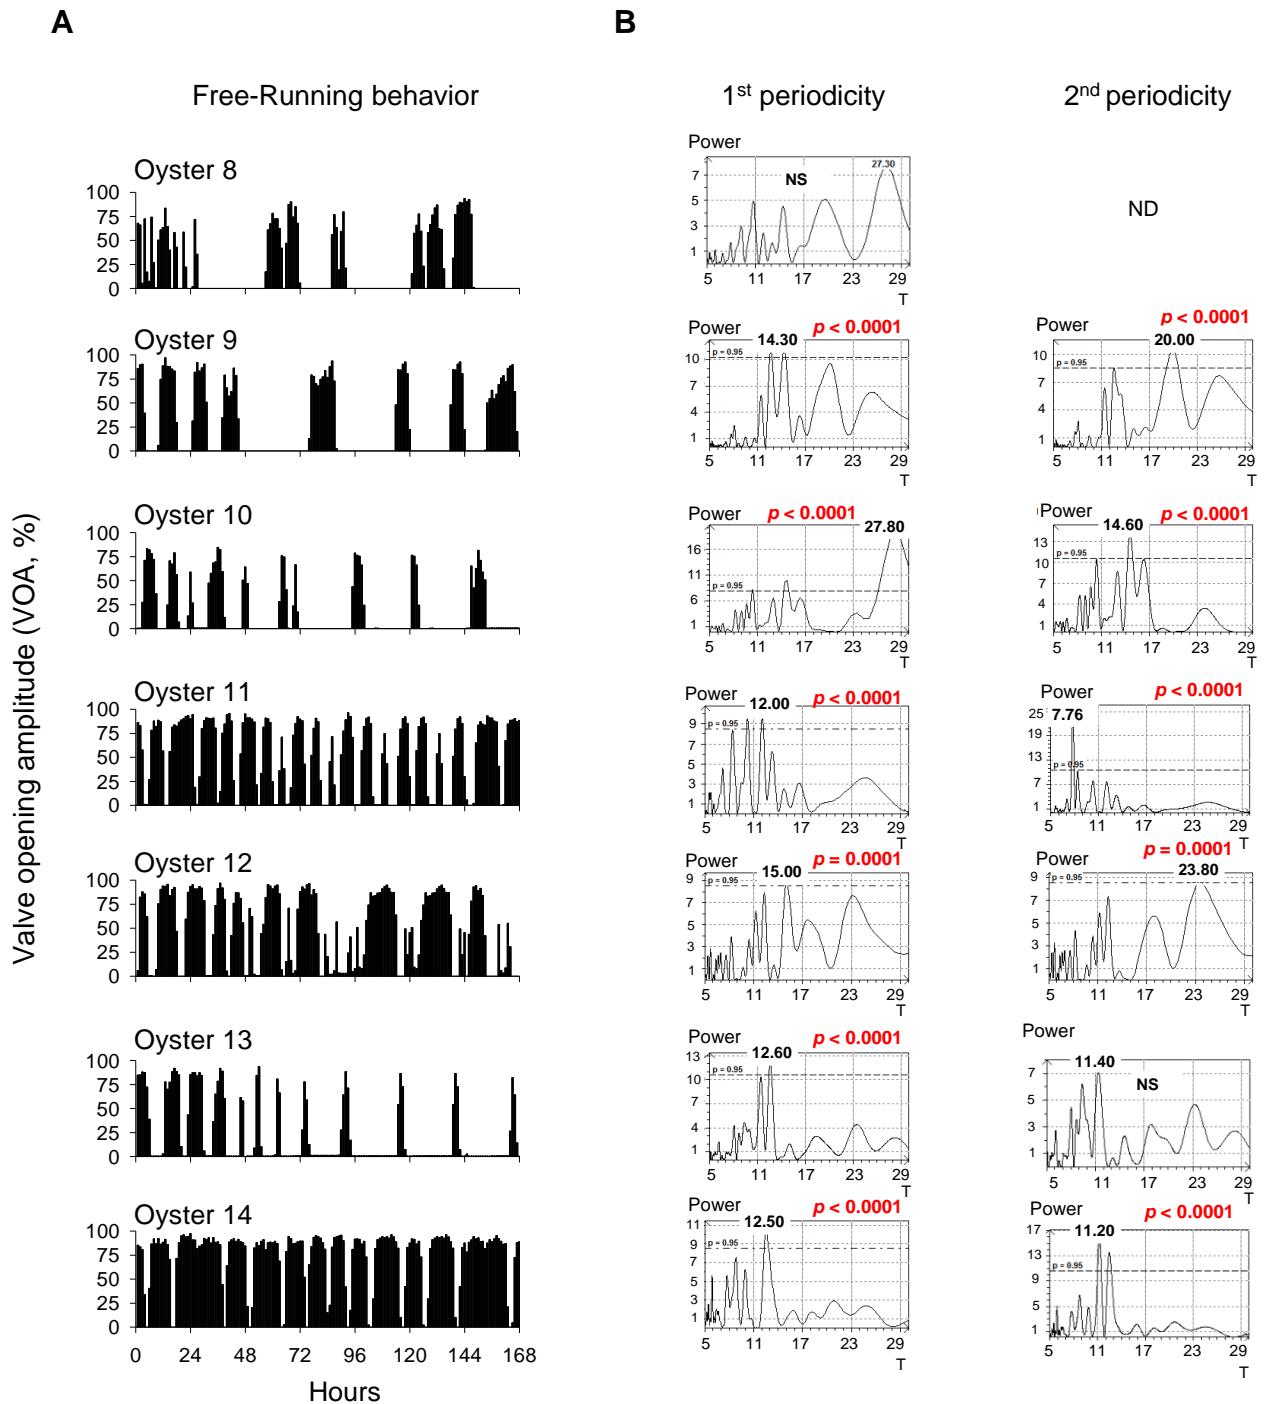

**Figure S3. Individual valve behavior under constant darkness in laboratory.** Related to Figure 2C. (A) Individual hourly valve opening amplitudes (VOA, %) during the 7 days of free-running experiment under constant darkness (DD, no food supply, 13°C, 18/03/2014, 00h00 – 24/03/2014, 00h00) after 3.5 weeks on the field (20/02/2014 – 17/03/2014, Eyraç, Arcachon Bay, France at 44.66°N). (B) Individual chronobiological analyses: search of circatidal ( $12.4 \pm 3.1$  h) and circadian ( $24 \pm 4$  h) periods determined by spectral analysis (Lomb and Scargle periodogram; dotted line for  $p$ -value  $> 0.95$ ) and adjusted  $p$ -value (in red) of the associated Cosinor model. 2<sup>nd</sup> periodicities correspond to the second significant periodicities after residue injection. NS means “non significant”, ND means “not determined” because of no first significant period found.

**Table S1A. Experimental supplementary information's of behavioral and molecular analyses in the field (Eyrac, Arcachon, FRANCE, lat. 44.66°N) in March 2018. Hours are expressed in local time (UTC +1). Related to Figure 2; Figure 3. Moon, Sun and water temperature data.**

| Date       | Moon phases   | Moonrise | Moonset | Moonrise | Meridian passing | Angle of the moon at the meridian | Moon illumination | Sunrise | Sunset  | Daylength, h | Solar noon, h and angle | Water temperature (°C) |
|------------|---------------|----------|---------|----------|------------------|-----------------------------------|-------------------|---------|---------|--------------|-------------------------|------------------------|
| 05/03/2018 |               | --       | 09 h 37 | 23 h 00  | 03 h 50          | (39,8°)                           | 88,4%             | 07 h 35 | 18 h 57 | 11:21:58     | 13 h 16 (39,4°)         | 9,7                    |
| 06/03/2018 |               | --       | 10 h 06 | --       | 04 h 37          | (35,4°)                           | 80,6%             | 07 h 33 | 18 h 58 | 11:25:04     | 13 h 15 (39,8°)         | 9,8                    |
| 07/03/2018 |               | 00 h 04  | 10 h 38 | --       | 05 h 24          | (31,6°)                           | 71,7%             | 07 h 31 | 19 h 00 | 11:28:09     | 13 h 15 (40,2°)         | 9,9                    |
| 08/03/2018 |               | 01 h 06  | 11 h 12 | --       | 06 h 11          | (28,5°)                           | 62,1%             | 07 h 30 | 19 h 01 | 11:31:15     | 13 h 15 (40,6°)         | 10,1                   |
| 09/03/2018 | Third Quarter | 02 h 04  | 11 h 49 | --       | 06 h 58          | (26,3°)                           | 52,3%             | 07 h 28 | 19 h 02 | 11:34:22     | 13 h 15 (41,0°)         | 10,4                   |
| 10/03/2018 |               | 02 h 59  | 12 h 31 | --       | 07 h 46          | (24,9°)                           | 42,5%             | 07 h 26 | 19 h 04 | 11:37:28     | 13 h 14 (41,3°)         | 10,8                   |
| 11/03/2018 |               | 03 h 50  | 13 h 18 | --       | 08 h 34          | (24,4°)                           | 33,0%             | 07 h 24 | 19 h 05 | 11:40:35     | 13 h 14 (41,7°)         | 11,0                   |
| 12/03/2018 |               | 04 h 37  | 14 h 09 | --       | 09 h 22          | (25,0°)                           | 24,2%             | 07 h 22 | 19 h 06 | 11:43:42     | 13 h 14 (42,1°)         | 11,2                   |
| 13/03/2018 |               | 05 h 18  | 15 h 05 | --       | 10 h 10          | (26,4°)                           | 16,3%             | 07 h 21 | 19 h 07 | 11:46:49     | 13 h 14 (42,5°)         | 11,4                   |
| 14/03/2018 |               | 05 h 55  | 16 h 04 | --       | 10 h 57          | (28,8°)                           | 9,7%              | 07 h 19 | 19 h 09 | 11:49:56     | 13 h 13 (42,9°)         | 11,4                   |
| 15/03/2018 |               | 06 h 29  | 17 h 05 | --       | 11 h 44          | (31,9°)                           | 4,5%              | 07 h 17 | 19 h 10 | 11:53:03     | 13 h 13 (43,3°)         | 11,6                   |
| 16/03/2018 |               | 07 h 00  | 18 h 08 | --       | 12 h 30          | (35,7°)                           | 1,3%              | 07 h 15 | 19 h 11 | 11:56:10     | 13 h 13 (43,7°)         | 11,7                   |
| 17/03/2018 | New Moon      | 07 h 29  | 19 h 13 | --       | 13 h 16          | (40,0°)                           | 0,1%              | 07 h 13 | 19 h 13 | 11:59:18     | 13 h 13 (44,1°)         | 11,7                   |
| 18/03/2018 |               | 07 h 57  | 20 h 19 | --       | 14 h 03          | (44,7°)                           | 1,2%              | 07 h 11 | 19 h 14 | 12:02:25     | 13 h 12 (44,5°)         | 11,7                   |
| 19/03/2018 |               | 08 h 25  | 21 h 26 | --       | 14 h 51          | (49,4°)                           | 4,8%              | 07 h 10 | 19 h 15 | 12:05:33     | 13 h 12 (44,9°)         | 11,3                   |
| 20/03/2018 |               | 08 h 55  | 22 h 35 | --       | 15 h 40          | (54,0°)                           | 10,7%             | 07 h 08 | 19 h 16 | 12:08:40     | 13 h 12 (45,3°)         | 10,2                   |
| 21/03/2018 |               | 09 h 28  | 23 h 44 | --       | 16 h 31          | (58,2°)                           | 18,7%             | 07 h 06 | 19 h 18 | 12:11:47     | 13 h 11 (45,7°)         | 10,0                   |
| 22/03/2018 |               | 10 h 05  | --      | --       | 17 h 25          | (61,6°)                           | 28,5%             | 07 h 04 | 19 h 19 | 12:14:54     | 13 h 11 (46,1°)         | 10,0                   |
| 23/03/2018 |               | --       | 00 h 53 | 10 h 48  | 18 h 21          | (64,0°)                           | 39,6%             | 07 h 02 | 19 h 20 | 12:18:02     | 13 h 11 (46,5°)         | 10,1                   |
| 24/03/2018 | First Quarter | --       | 02 h 00 | 11 h 38  | 19 h 19          | (65,1°)                           | 51,4%             | 07 h 00 | 19 h 21 | 12:21:09     | 13 h 10 (46,9°)         | 10,3                   |

**Table S1B. Experimental supplementary information's of behavioral and molecular analyses in the field (Eyrac, Arcachon, FRANCE, lat. 44.66°N) in March 2018. Hours are expressed in local time (UTC +1). Related to Figure 2; Figure 3. Tides data.**

| Date       | Hours | Sea level, m | Tide coefficients |
|------------|-------|--------------|-------------------|
| 05/03/2018 | 01h32 | 0.29         |                   |
|            | 07h43 | 4.45         | 100               |
|            | 13h53 | 0.4          |                   |
|            | 20h00 | 4.2          | 94                |
| 06/03/2018 | 02h05 | 0.46         |                   |
|            | 08h18 | 4.2          | 88                |
|            | 14h25 | 0.63         |                   |
|            | 20h34 | 3.97         | 81                |
| 07/03/2018 | 02h38 | 0.69         |                   |
|            | 08h52 | 3.9          | 74                |
|            | 14h57 | 0.9          |                   |
|            | 21h10 | 3.71         | 66                |
| 08/03/2018 | 03h13 | 0.96         |                   |
|            | 09h33 | 3.59         | 58                |
|            | 15h33 | 1.19         |                   |
|            | 21h55 | 3.45         | 51                |
| 09/03/2018 | 03h53 | 1.25         |                   |
|            | 10h26 | 3.29         | 44                |
|            | 16h17 | 1.47         |                   |
|            | 22h58 | 3.22         | 38                |
| 10/03/2018 | 04h48 | 1.52         |                   |
|            | 11h38 | 3.09         | 33                |
|            | 17h31 | 1.68         |                   |
| 11/03/2018 | 00h16 | 3.13         | 30                |
|            | 06h25 | 1.63         |                   |
|            | 13h03 | 3.06         | 30                |
|            | 19h12 | 1.64         |                   |
| 12/03/2018 | 01h39 | 3.21         | 33                |
|            | 07h48 | 1.47         |                   |
|            | 14h27 | 3.21         | 37                |
|            | 20h18 | 1.42         |                   |
| 13/03/2018 | 02h48 | 3.43         | 43                |
|            | 08h46 | 1.22         |                   |
|            | 15h20 | 3.45         | 49                |
|            | 21h09 | 1.17         |                   |
| 14/03/2018 | 03h35 | 3.69         | 55                |
|            | 09h33 | 0.98         |                   |
|            | 16h01 | 3.7          | 62                |
|            | 21h54 | 0.93         |                   |
| 15/03/2018 | 04h15 | 3.93         | 68                |
|            | 10h16 | 0.77         |                   |
|            | 16h37 | 3.91         | 74                |
|            | 22h36 | 0.73         |                   |
| 16/03/2018 | 04h52 | 4.13         | 79                |
|            | 10h57 | 0.6          |                   |
|            | 17h13 | 4.09         | 84                |
|            | 23h15 | 0.57         |                   |
| 17/03/2018 | 05h28 | 4.29         | 88                |
|            | 11h37 | 0.48         |                   |
|            | 17h47 | 4.21         | 92                |
|            | 23h54 | 0.46         |                   |
| 18/03/2018 | 06h03 | 4.39         | 94                |
|            | 12h14 | 0.41         |                   |
|            | 18h21 | 4.28         | 96                |
| 19/03/2018 | 00h31 | 0.4          |                   |
|            | 06h37 | 4.43         | 98                |
|            | 12h50 | 0.4          |                   |
|            | 18h53 | 4.3          | 98                |
| 20/03/2018 | 01h05 | 0.41         |                   |
|            | 07h11 | 4.41         | 97                |
|            | 13h23 | 0.45         |                   |
|            | 19h28 | 4.26         | 95                |
| 21/03/2018 | 01h38 | 0.46         |                   |
|            | 07h49 | 4.32         | 92                |
|            | 13h56 | 0.55         |                   |
|            | 20h06 | 4.15         | 88                |
| 22/03/2018 | 02h13 | 0.57         |                   |
|            | 08h30 | 4.13         | 84                |
|            | 14h33 | 0.71         |                   |
|            | 20h50 | 3.96         | 78                |
| 23/03/2018 | 02h54 | 0.73         |                   |
|            | 09h18 | 3.89         | 72                |
|            | 15h16 | 0.92         |                   |
|            | 21h41 | 3.74         | 66                |
| 24/03/2018 | 03h44 | 0.95         |                   |
|            | 10h16 | 3.63         | 59                |
|            | 16h11 | 1.16         |                   |
|            | 22h46 | 3.55         | 53                |



**Table S1C. Experimental supplementary information's of behavioral and molecular analyses in the field (Eyrac, Arcachon, FRANCE, lat. 44.66°N) in March 2018. Hours are expressed in local time (UTC +1). Related to Figure 2; Figure 3. Details of sampling times for the molecular analysis.**

| Sampling time | Date       | Hour  |
|---------------|------------|-------|
| 1             | 14/03/2018 | 18h48 |
| 2             | 14/03/2018 | 21h54 |
| 3             | 15/03/2018 | 1h00  |
| 4             | 15/03/2018 | 4h06  |
| 5             | 15/03/2017 | 7h12  |
| 6             | 15/03/2018 | 10h18 |
| 7             | 15/03/2018 | 13h24 |
| 8             | 15/03/2018 | 16h30 |
| 9             | 15/03/2018 | 19h36 |
| 10            | 15/03/2018 | 22h42 |
| 11            | 16/03/2018 | 1h48  |
| 12            | 16/03/2018 | 4h54  |
| 13            | 16/03/2018 | 8h00  |
| 14            | 16/03/2018 | 11h06 |
| 15            | 16/03/2018 | 14h12 |
| 16            | 16/03/2018 | 17h18 |

**Table S2. Field chronobiological analysis of individual oyster behavior.** Related to Figure 2. Valve opening amplitudes (VOA) were recorded at 4 m depth ( $\pm$  tides) over 18 days of field experiment (05/03/2018 – 23/03/2018, Eyrac, Arcachon Bay, France at 44.66°N). TSA Cosinor analysis was used to detect tidal periodicities (12.4h and 6.2 h periods) and daily ones (24 h). For each oyster (n = 15), significant rhythms were determined by the periods found with Lomb and Scargle periodograms and by the adjusted *p*-value of the Cosinor model. Value of the percent rhythm (%) of the model is indicated in parenthesis 2<sup>nd</sup> periodicities correspond to the second significant periodicities after residue injections. \*\*\**p*-value < 0.0001; \*\*\*\**p*-value < 0.00001.

| <b>TSA Cosinor analysis – Field Individual analysis of VOA</b> |                               |                              |                              |
|----------------------------------------------------------------|-------------------------------|------------------------------|------------------------------|
| Individual                                                     | 12.4 $\pm$ 0.5 h range        | 6.2 $\pm$ 0.2 h range        | 24 $\pm$ 1 h range           |
| Oyster 1                                                       | 12.4 $\pm$ 0.5****<br>(24.0%) | 6.2 $\pm$ 0.8****<br>(6.2%)  | 24.5 $\pm$ 0.2****<br>(2.9%) |
| Oyster 2                                                       | 12.5 $\pm$ 0.2****<br>(15.1%) | 6.2 $\pm$ 0.7****<br>(10.1%) | 24.6 $\pm$ 0.2****<br>(5.5%) |
| Oyster 3                                                       | 12.4 $\pm$ 0.2****<br>(10.6%) | 6.2 $\pm$ 1.0***<br>(21.9%)  | 23.1 $\pm$ 0.2****<br>(4.7%) |
| Oyster 4                                                       | 12.5 $\pm$ 0.2****<br>(20.5%) | 6.2 $\pm$ 1.1****<br>(3.9%)  | 24.1 $\pm$ 0.1****<br>(4.9%) |
| Oyster 5                                                       | 12.5 $\pm$ 0.2****<br>(12.8%) | 6.2 $\pm$ 0.7****<br>(8.3%)  | 24.3 $\pm$ 0.2****<br>(4.2%) |
| Oyster 6                                                       | 12.4 $\pm$ 0.3****<br>(4.8%)  | NS                           | NS                           |
| Oyster 7                                                       | 12.4 $\pm$ 0.2****<br>(12.1%) | 6.2 $\pm$ 0.8****<br>(7.6%)  | 24.5 $\pm$ 0.2****<br>(3.4%) |
| Oyster 8                                                       | 12.4 $\pm$ 0.3****<br>(8.4%)  | 6.2 $\pm$ 0.7****<br>(8.6%)  | NS                           |
| Oyster 9                                                       | 12.3 $\pm$ 0.2****<br>(13.8%) | 6.2 $\pm$ 0.8****<br>(2.4%)  | 24.2 $\pm$ 0.1****<br>(4.8%) |
| Oyster 10                                                      | 12.4 $\pm$ 0.2****<br>(16.1%) | 6.2 $\pm$ 0.7****<br>(8.6%)  | 24.6 $\pm$ 0.1****<br>(5.5%) |
| Oyster 11                                                      | 12.5 $\pm$ 0.1****<br>(23.3%) | 6.2 $\pm$ 0.7***<br>(10.8%)  | NS                           |
| Oyster 12                                                      | 12.5 $\pm$ 0.2****<br>(9.5%)  | 6.2 $\pm$ 0.8****<br>(7.9%)  | 24.1 $\pm$ 0.1****<br>(6.1%) |
| Oyster 13                                                      | 12.5 $\pm$ 0.2****<br>(13.5%) | 6.2 $\pm$ 0.7****<br>(8.6%)  | 23.8 $\pm$ 0.2***<br>(2.0%)  |
| Oyster 14                                                      | 12.3 $\pm$ 0.2****<br>(14.7%) | 6.2 $\pm$ 1.0****<br>(4.9%)  | 24.7 $\pm$ 0.1****<br>(4.9%) |
| Oyster 15                                                      | 12.4 $\pm$ 0.1****<br>(16.0%) | 6.2 $\pm$ 0.6****<br>(13.4%) | 24.4 $\pm$ 0.2****<br>(2.6%) |
| Total                                                          | 100% (15/15)                  | 93.3% (14/15)                | 80% (12/15)                  |

**Table S3. Forward, reverse primer sequences of Real-Time PCR analyzed genes.**  
Related to figure 3; figure 4.

| GeneBank access                           | Gene name                                      | Forward primer                | Reverse primer               |
|-------------------------------------------|------------------------------------------------|-------------------------------|------------------------------|
| <i>Crassostrea gigas</i> core clock genes |                                                |                               |                              |
| KX371073                                  | <i>Cgclock</i> (Clock)                         | 5'-TGGGAATGATGTCCAACAGAG-3'   | 5'-GGTCCATCAATGACAGGAAGT-3'  |
| KT991835                                  | <i>Cgcryptochrome 1</i><br>( <i>Cry1</i> )     | 5'-TCATGAAGCAGCTCAGATACG-3'   | 5'-ACCTCCCAGTTCAACCAAAG-3'   |
| KX371074                                  | <i>Cgcryptochrome 2</i><br>( <i>Cry2</i> )     | 5'-AACCTTACAGCAAGCACGAA-3'    | 5'-TGACATCTGGCTGTGGTTTC-3'   |
| KX371075                                  | <i>Cgbmal1</i> ( <i>Bmal</i> )                 | 5'-CACAAGTTCAGGTCAGAGTGTAG-3' | 5'-TCACCTGAGGTAGACTGGTTAT-3' |
| KX371076                                  | <i>Cgperiod</i> ( <i>Per</i> )                 | 5'-CCGATGACAGAAATCCCAGTAG-3'  | 5'-CCATCCTATTCTCCTGCTCTTG-3' |
| KJ188106                                  | <i>Cgrev-erb</i> ( <i>Rev-erb</i> )            | 5'-GACTTTGCTGATCGCTTCAAC-3'   | 5'-CTTTCCAAGTCTCCACATTTTC-3' |
| EKC18621                                  | <i>Cgror</i> ( <i>Ror</i> )                    | 5'-CTACGTGAGCAGGTGTTTGA-3'    | 5'-CGTCCGCTATGTCCTTCAAT-3'   |
| KX371077                                  | <i>Cgtimless 1</i> ( <i>Tim1</i> )             | 5'-AAAGATCCCGACACAGTATG-3'    | 5'-TGGAAGTCTGCTGACTTG-3'     |
| Clock-associated genes                    |                                                |                               |                              |
| EKC41768                                  | <i>Hiomt-like</i>                              | 5'-CGGGTGGATCAGTGTTAGTAATG-3' | 5'-TCTCTTGGCCCTGTGATAGA-3'   |
| XM_011433587                              | <i>Rhodopsin-like 1</i>                        | 5'-TAGTTCGGCGTCGGAATTTATC-3'  | 5'-CTGTTCGAATCTCTGCTCTCAC-3' |
| XM_011448766                              | <i>Rhodopsin-like 2</i>                        | 5'-CCCTGAGTCATCCCAAATTCA-3'   | 5'-GATGTTCTCGGCGTAGCTTTA-3'  |
| XM_020065754                              | <i>Rhodopsin-like 3</i>                        | 5'-TGACTTTGACGGCGATACTG-3'    | 5'-ATAGATCCGCCACCGAAATG-3'   |
| Housekeeping genes                        |                                                |                               |                              |
| AB122066                                  | <i>CgElongation Factor 1</i><br>( <i>Ef1</i> ) | 5'-ACCACCCTGGTGAGATCAAG-3'    | 5'-ACGACGATCGCATTCTCTT-3'    |
| CAD67717                                  | <i>CgGadph</i>                                 | 5'-CGTACCAGTTCAGATGTTTCC-3'   | 5'-GCCTTGATGGCTGCCTTAATA-3'  |
